# Supplementary material for: Decreased maternal serum acetate and impaired fetal thymic and regulatory T cell development in preeclampsia
Source: PubMed Central journal article supplement (PMC6620275; doi:10.1038/s41467-019-10703-1), 2019-07-10
Supplement: 41467_2019_10703_MOESM1_ESM.pdf [file 41467_2019_10703_MOESM1_ESM.pdf]

## **Supplementary Information**

**Decreased maternal serum acetate and impaired fetal  
thymic and regulatory T cell development in preeclampsia**

**HU et al.**

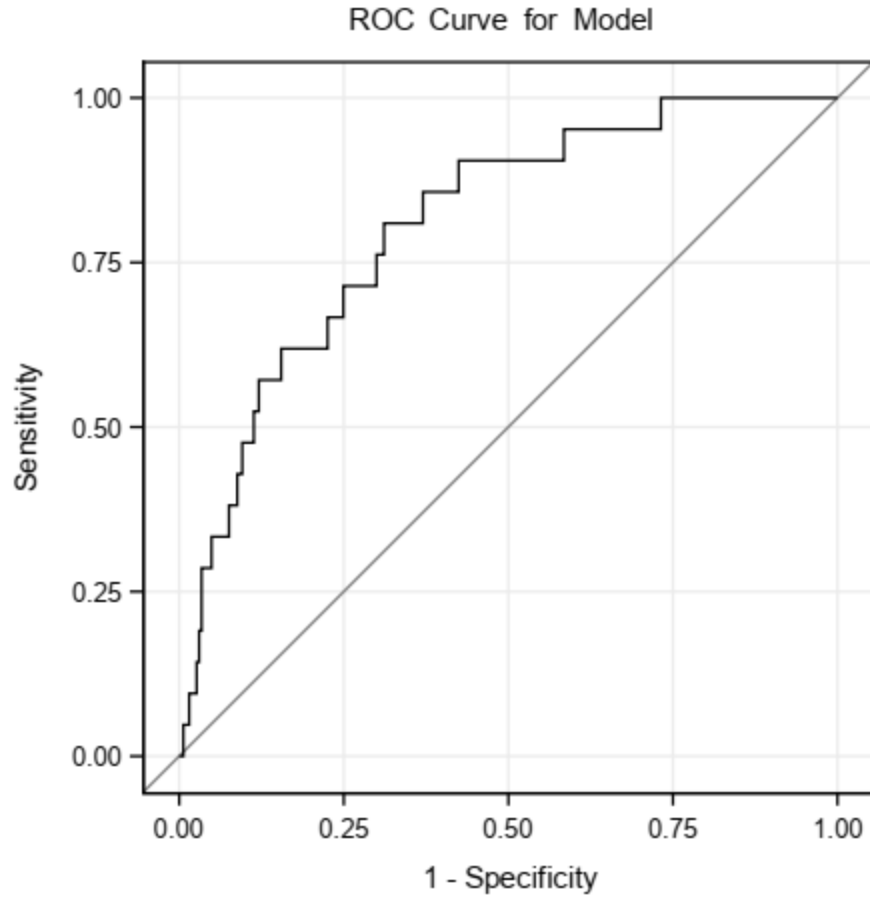

**Supplementary Figure. 1 Fetal thymus diameter at mid-gestation as a predictive tool for preeclampsia.**

Fetal thymus diameter at 17-22 weeks gestation was evaluated as a predictive tool for preeclampsia in a model which also included fetal head circumference at mid-gestation, gestational age and maternal BMI variables. ROC curve analysis was found to have an AUC of 0.81.

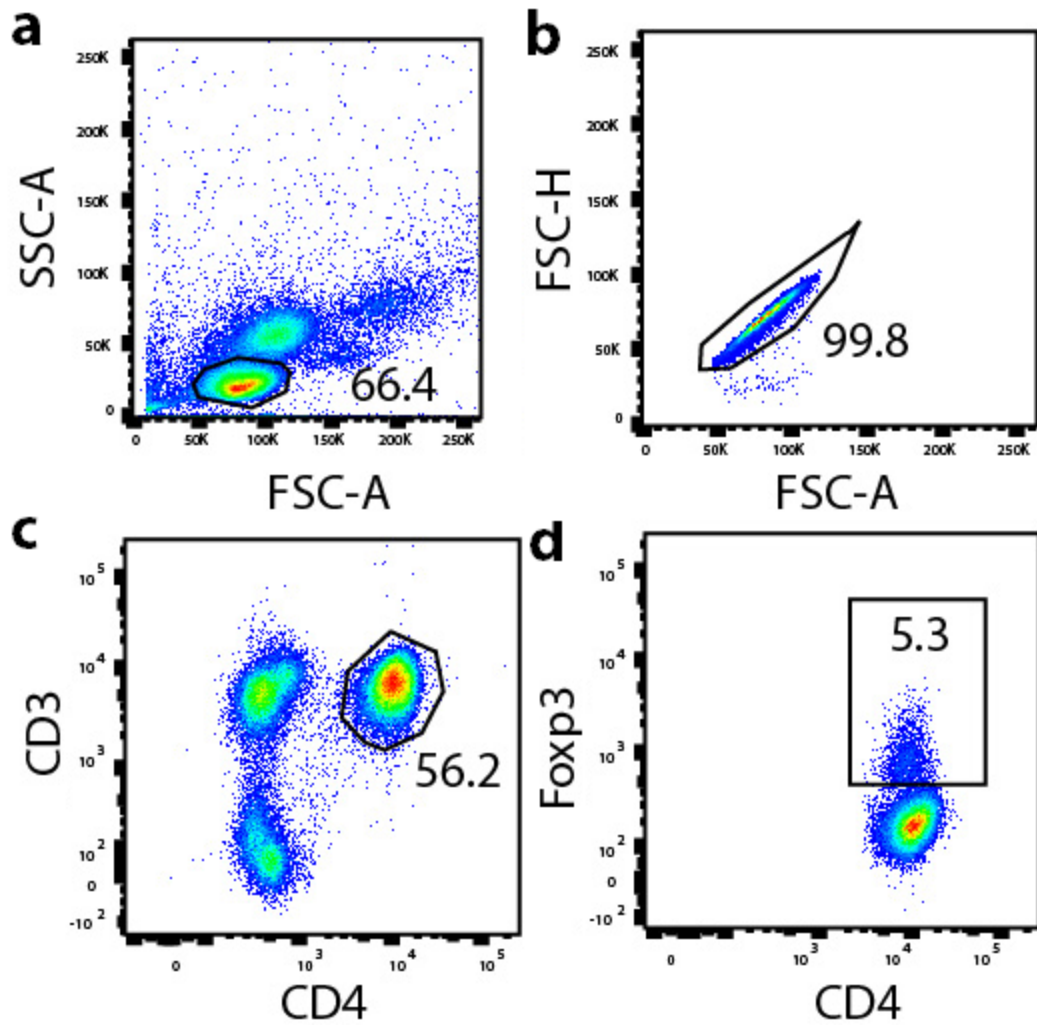

**Supplementary Figure 2 (corresponding to Fig. 2a-2b). Gating strategy for analysis of Foxp3<sup>+</sup> Tregs from PBMC**

(a-b) Lymphocytes and single cells were gated based on forward and side scatter. (c-d) CD4<sup>+</sup>CD3<sup>+</sup> cells were identified from total lymphocytes and selected for the expression of Foxp3.

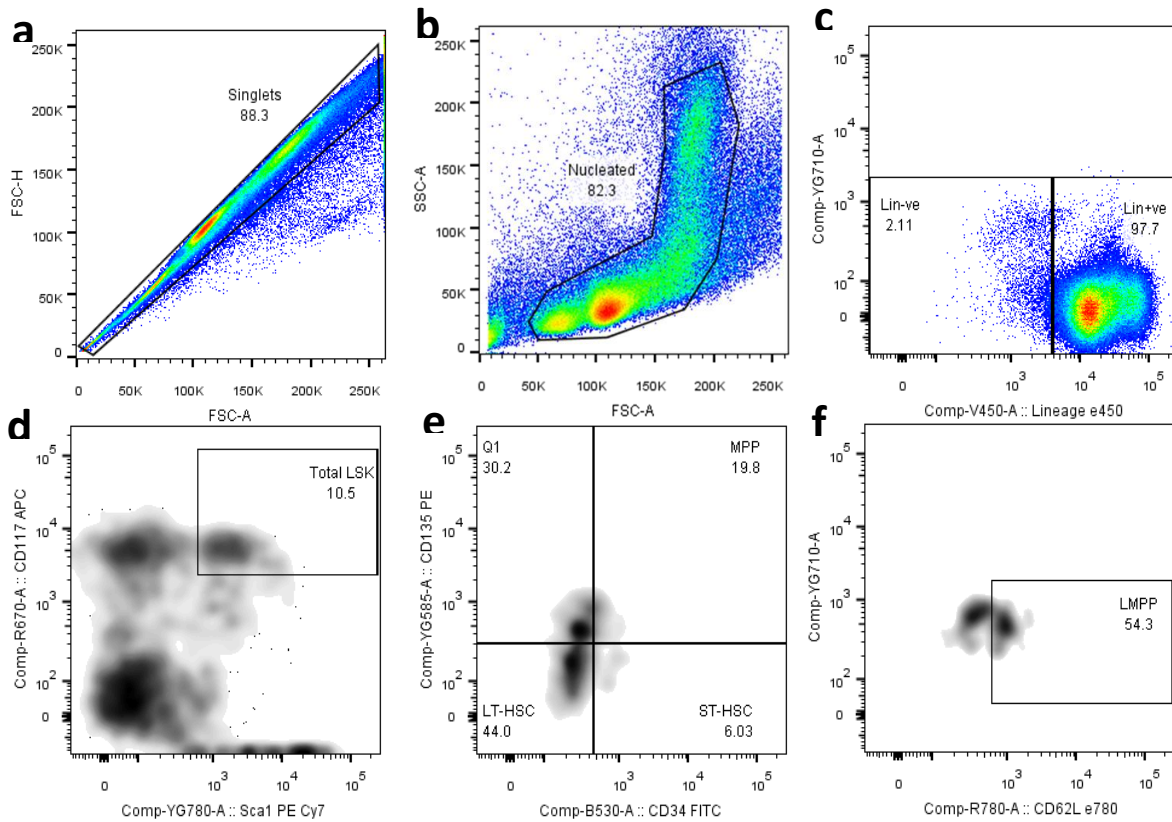

**Supplementary Figure 3 (corresponding to Fig. 6d). Gating strategy to identify bone marrow lymphoid-primed multipotent progenitors (LMPP)**

**(a-b)** Forward versus side scatter plots were used to select nucleated cells and exclude cellular debris. **(c)** Bone marrow cells were gated to exclude all lineage positive (Lin+ve) markers which includes a combination of the surface markers NK1.1, CD3e, CD4, CD8a, CD11b, CD19, Ly6G, TER119, CD11c and CD45R/B220. **(d)** Total Lin-Sca+Kit+ (LSK) cells were selected based on positive expressions of CD117 and Sca1. **(e)** The LSK population was further divided into long-term hematopoietic stem cells (LT-HSC), short-term hematopoietic stem cells (ST-HSC) and multipotent progenitors (MPP) based on differential expressions of CD135 and CD34. **(f)** LMPP was identified based on the positive expression of CD62L.

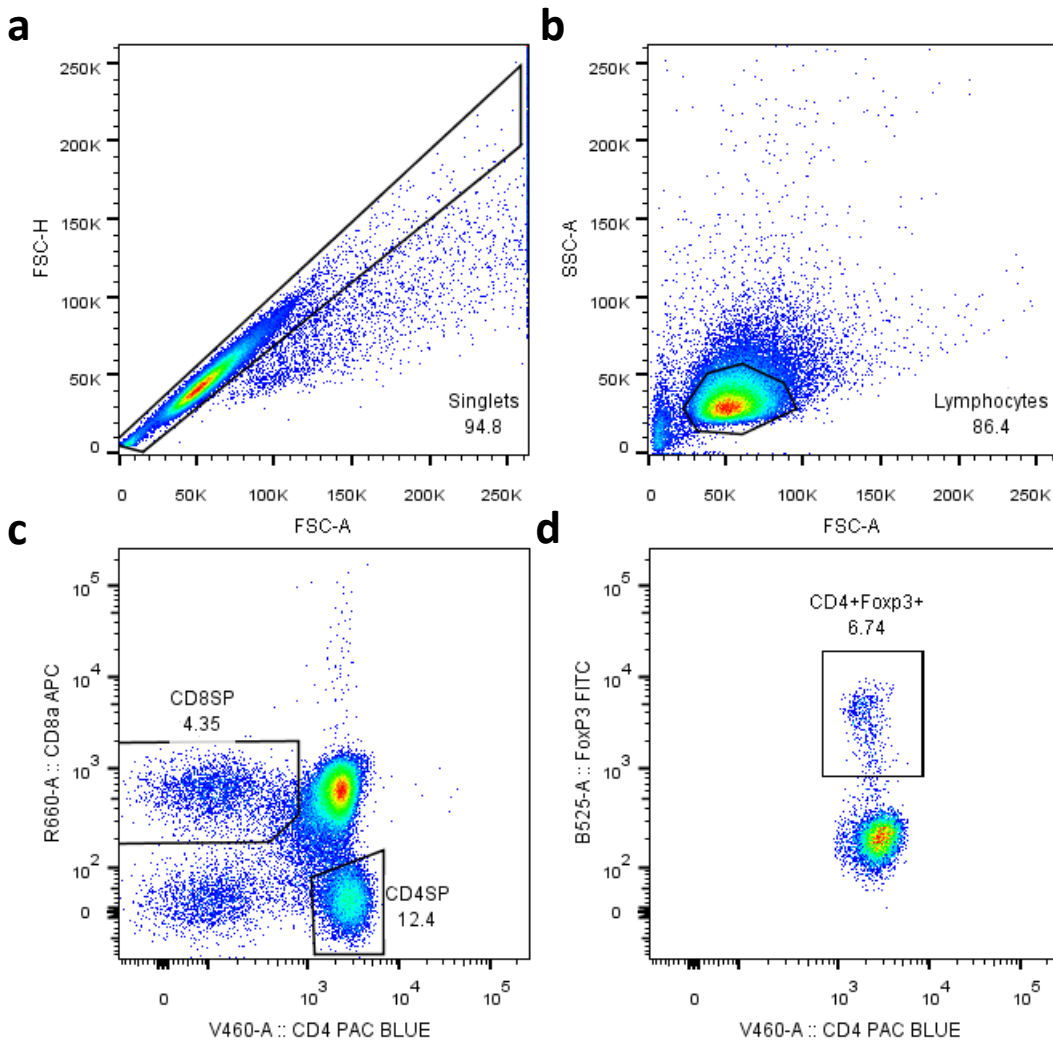

**Supplementary Figure 4 (corresponding to Fig. 6e & f). Gating strategy for analysis of Foxp3<sup>+</sup> Tregs from thymus**

**(a-b)** Single cells and lymphocytes were gated based on forward and side scatter. **(c)** CD8 single positive (CD8SP) and CD4 single positive (CD4SP) cells were identified from total lymphocytes.

**(d)** CD4SP cells were selected for further analysis and examined for the expression of Foxp3.

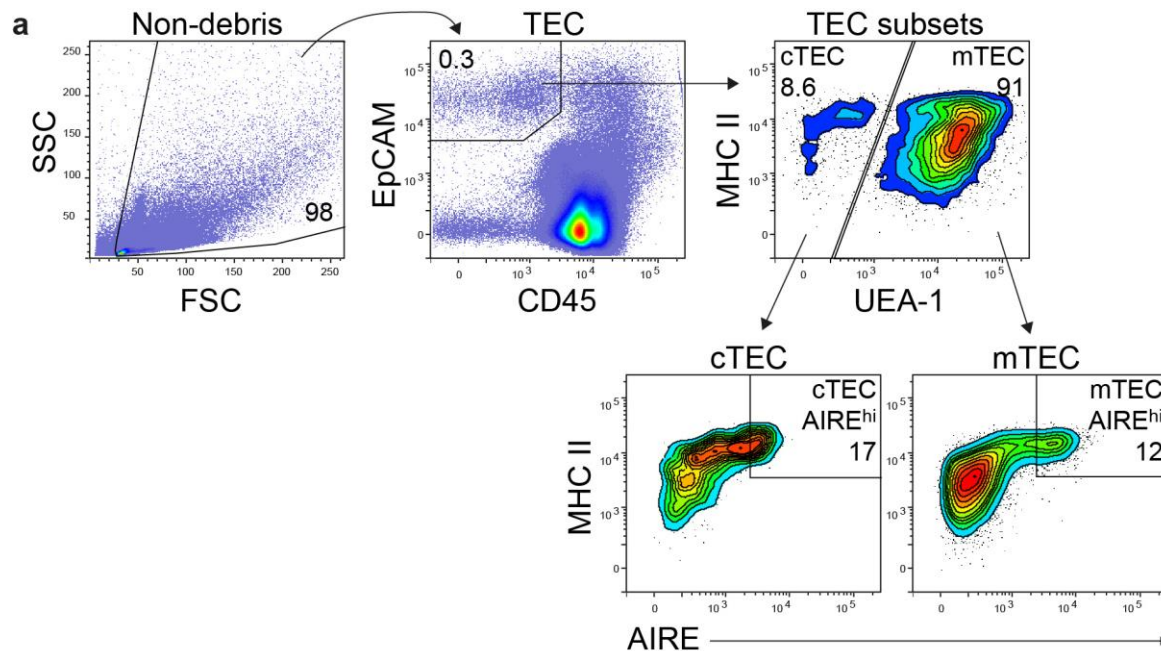

**b**

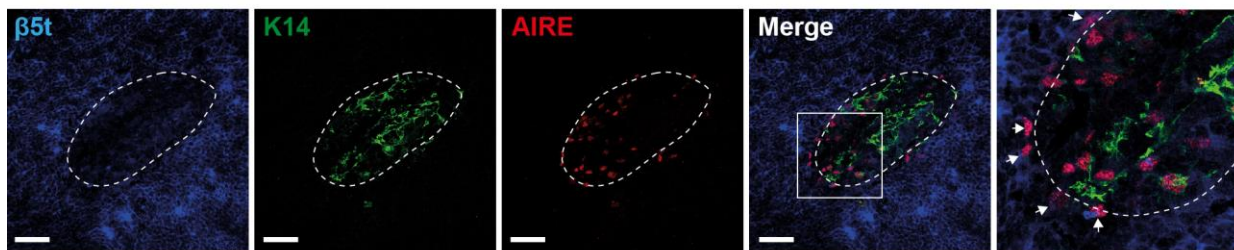

### Supplementary Figure 5. Thymus Expression Levels of the Autoimmune Regulator (AIRE) Protein

**(a)** Gating strategy for flow cytometry analysis of AIRE expression in thymic epithelial cell (TEC; EpCAM<sup>+</sup>CD45<sup>-</sup>) subsets.

**(b)** 3-week-old C57BL/6 pups from control SPF and GF mothers and GF mothers treated with acetate in drinking water (ADW). **(a)** Immunofluorescence staining of thymus sections from age-matched untreated C57BL/6 mice showing AIRE expression in K14<sup>+</sup>medulla and in  $\beta$ 5t<sup>+</sup> cortical epithelial cells (cTEC; white arrows) situated at the cortico-medullary junction.  $\beta$ 5t=cortical epithelial marker; K14=medullary epithelial cell (mTEC) marker; scale bars = 50 $\mu$ m.

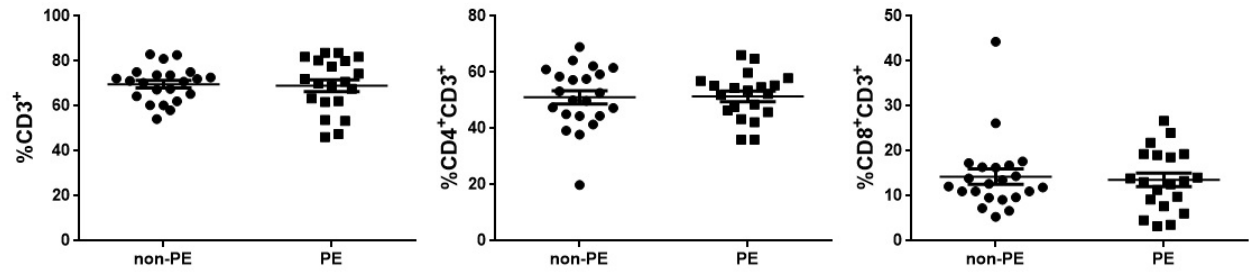

**Supplementary Figure 6. The different subsets of fetal thymic T cells in normal and preeclamptic pregnancies**

Scattered dot plots comparing the percentages (Mean  $\pm$  SEM) of thymic T cells (CD3<sup>+</sup> cells), conventional CD4 and CD8 T cell subsets (from left to right) within lymphocytes in cord blood (n=22 for non-PE, n=20 for PE group).

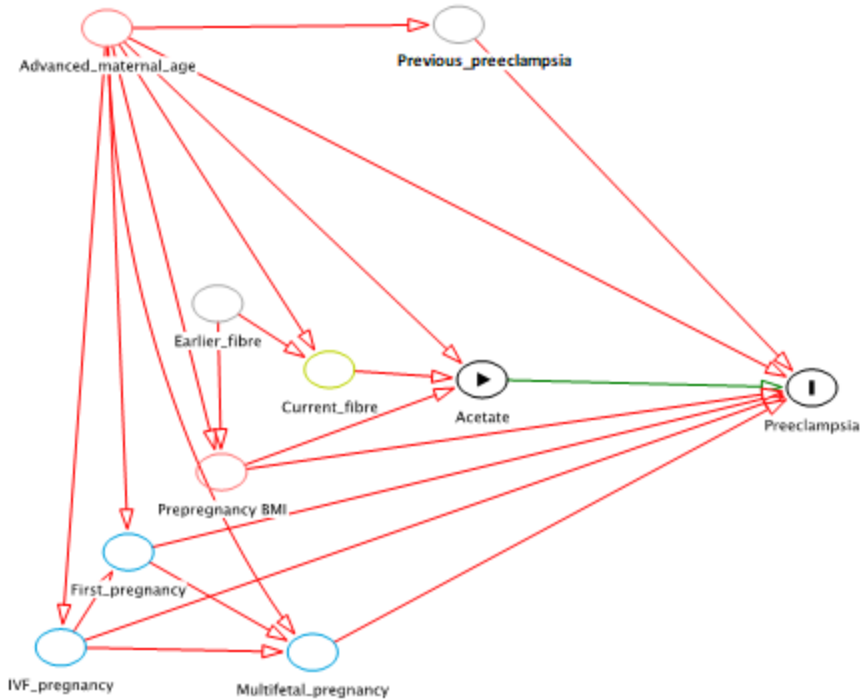

**Supplementary Figure 7.**

A directed acyclic graph (DAG) drawn from <http://www.dagitty.net/> (DAGitty: A Graphical Tool for Analysing Causal Diagrams) to demonstrate the proposed causal relationship between the primary exposure (serum acetate), the primary outcome (preeclampsia) and relevant covariates. Nodes, or factors, are denoted by circles, and lines with an arrowhead are drawn to represent the direction of the relationship between the nodes (e.g. increased BMI is associated with increased risk of preeclampsia rather than vice versa). Red nodes = potential confounding factors; green nodes = ancestors of the exposure; grey nodes = unobserved factors; blue nodes = ancestors of the outcome. The DAG assists in selecting potential confounding variables to be included in the statistical model, on the basis of a temporally and biologically plausible proposed causal model. The potential confounding variables identified in this DAG were advanced maternal age and pre-pregnancy body mass index (BMI).



**Supplementary Table 1a.** Participant Characteristics of *Nepean cohort 1*

| Characteristic                        | Control (n=50) | Preeclampsia (n=50) | P value           |
|---------------------------------------|----------------|---------------------|-------------------|
| <b>Maternal</b>                       |                |                     |                   |
| Maternal age (yr)                     | 30 ± 6.1       | 29 ± 6.1            | 0.38              |
| Caucasian ethnicity                   | 45 (90%)       | 43 (86%)            | 0.54              |
| Body Mass Index (kg/m <sup>2</sup> )  | 24 (21-26)     | 28 (24-34)          | <b>&lt; 0.001</b> |
| Gestation at ultrasound (wk.)         | 32 (27-35)     | 34 (31-37)          | <b>0.003</b>      |
| Gestational diabetes                  | 1 (2%)         | 4 (8%)              | 0.17              |
| <b>Fetal</b>                          |                |                     |                   |
| Ultrasound estimated fetal weight (g) | 1894 ± 884     | 2412 ± 1097         | <b>0.01</b>       |
| Small for gestational age             | 5 (10%)        | 10 (20%)            | 0.19              |
| Large for gestational age             | 4 (8%)         | 7 (3%)              | 0.20              |

Continuous variable presented as mean ± SD or median (Q1-Q3); categorical variables presented as numbers (percentage). Small for gestational age and large for gestational age were defined as an estimated fetal weight (EFW) less than 10<sup>th</sup> centile and more than 90<sup>th</sup> centile, respectively, based on Hadlock formula.

**Supplementary Table 1b.** T-test output of thymus measurements in control and preeclampsia group of *Nepean cohort 1*

| Variable                | Preeclampsia<br>(mean) | Non-Preeclampsia<br>(mean) | Mean difference<br>(95% CI) | p-value       |
|-------------------------|------------------------|----------------------------|-----------------------------|---------------|
| Volume (mL)             | 1.6±1.2                | 2.6±1.3                    | 0.98 (0.49-1.46)            | <b>0.0001</b> |
| MTD (cm)                | 2.9±0.8                | 3.3±0.8                    | 0.49 (0.08-0.71)            | <b>0.01</b>   |
| APD (cm)                | 1.3                    | 1.2                        | -0.008 (-0.15-0.13)         | 0.92          |
| Circumference (mm)      | 75.5                   | 82.1                       | 6.64 (-1.151-14.80)         | 0.11          |
| Area (cm <sup>2</sup> ) | 348.6                  | 402.4                      | 54 (-9-117)                 | 0.09          |

MTD: maximum transverse diameter, APD: anteroposterior diameter

**Supplementary Table 2.** Participant Characteristics *Nepean cohort 2*

| Characteristic                  | Preeclampsia (24)     | Non-Preeclampsia (863) | p-value           |
|---------------------------------|-----------------------|------------------------|-------------------|
| Maternal age (yr)               | 26.5 (22.0 - 33.0)    | 29.0 (25.0 - 32.0)     | 0.18              |
| Nulliparity (%)                 | 62.5                  | 33.7                   | <b>0.007</b>      |
| Body Mass Index (kg.m-2)        | 28.1 (24.4 - 34.9)    | 25.2 (22.1 - 30.0)     | <b>0.03</b>       |
| Fetal morphometry at ultrasound |                       |                        |                   |
| Gestation (wk.)                 | 19.3 (19.0 - 19.9)    | 19.1 (18.9 - 19.6)     | 0.18              |
| Thymus diameter (mm)            | 16.5 (2.1)            | 18.3 (2.2)             | <b>0.0002*</b>    |
| Head circumference (mm)         | 166.6 (159.9 - 170.8) | 162.5 (157.4 - 167.7)  | <b>0.04</b>       |
| Biparietal diameter (mm)        | 44.5 (42.5 - 45.8)    | 43.7 (42.0 - 45.4)     | 0.27              |
| Abdominal circumference (mm)    | 142.9 (140.8 - 149.4) | 141.6 (136.2 - 148.0)  | 0.11              |
| Femur length (mm)               | 30.9 (29.5 - 32.0)    | 29.9 (28.5 - 31.3)     | <b>0.02</b>       |
| Gestation at delivery (wk.)     | 37.2 (34.4 - 38.8)    | 39.9 (38.9 - 40.7)     | <b>&lt;0.0001</b> |

\*Unpaired t-test expressed as Mean (SD). All other analyses used Mann-Whitney U-test, expressed as Median (Q1 – Q3).

**Supplementary Table 3.** Participant Characteristics of *Nepean cohort 3*

| Characteristic        | Preeclampsia (30) | Non-Preeclampsia (62) |
|-----------------------|-------------------|-----------------------|
| Maternal age (yr)     | 28.9±6            | 30.3±4.8              |
| Gestational week      | 35.4±3.2          | 39.2±0.9              |
| Birthweight (g)       | 2527±1054         | 3558±451              |
| Steroid treatment (%) | 50                | 0                     |

**Supplementary Table 4.** Participant Characteristics of *BIS cohort*

| Characteristic       | Preeclampsia (31) | Non-Preeclampsia (293) | p-value |
|----------------------|-------------------|------------------------|---------|
| Maternal Age (yr)    | 31.77±5.42        | 32.28±4.33             | 0.55    |
| Previous pregnancies |                   |                        | 0.005   |
| No                   | 14 (46.7%)        | 65 (23.0%)             |         |
| Yes                  | 16 (53.3%)        | 217 (77.0%)            |         |
| BMI                  | 27.81±5.70        | 25.60±5.45             | 0.060   |
| Gestation week       | 37.58±2.25        | 39.16±1.42             | <0.001  |
| Birthweight (g)      | 3095.32±604.20    | 3562.69±536.41         | <0.001  |
| Steroid Treatment    |                   |                        | 0.57    |
| No                   | 31 (100.0%)       | 290 (99.0%)            |         |
| Yes                  | 0 (0.0%)          | 3 (1.0%)               |         |

**Supplementary Table 5a.** Participant Characteristics of *Autopsy cohort*

| Characteristic            | Preeclampsia (5) | Non-Preeclampsia (6) | p-value      |
|---------------------------|------------------|----------------------|--------------|
| Maternal age (yr)         | 32.2±6.26        | 31.33±3.78           | 0.773        |
| Nulliparous               | 3 (60%)          | 4 (66.67%)           | 0.999        |
| Gestational age (wk)      | 24.8±1.30        | 23.83±1.47           | 0.292        |
| Birth weight (g)          | 394.6±70.35      | 655.2±231.9          | 0.058        |
| Thymus weight (g)         | 0.28±0.13        | 1.33±0.70            | <b>0.004</b> |
| Spleen weight (g)         | 0.52±0.22        | 1.3±0.80             | <b>0.030</b> |
| Placental disc weight (g) | 109.4±37.67      | 212±55.7             | <b>0.032</b> |

**Supplementary Table 5b.** T cell populations in the fetal thymus and spleen of *Autopsy cohort*

| Variable                  | PE.1 | PE.2 | PE.3 | PE.4 | PE.5 | p-value | n-<br>PE.1 | n-<br>PE.2 | n-<br>PE.3 | n-<br>PE.4 | n-<br>PE.5 | n-<br>PE.6 |
|---------------------------|------|------|------|------|------|---------|------------|------------|------------|------------|------------|------------|
| <b>Placental features</b> |      |      |      |      |      |         |            |            |            |            |            |            |
| of preeclampsia€          | 2    | 1    | 1    | 1    | 0    | –       | 0          | 0          | 0          | 0          | –          | –          |
| <b>Thymus Foxp3:</b>      |      |      |      |      |      |         |            |            |            |            |            |            |
| Expression*               | 0    | 0    | 0    | 0    | 0    |         | 1          | 0          | 1          | 1          | 1          | 0          |
| Location^                 | 0    | 0    | 0    | 0    | 0    |         | 2          | 0          | 2          | 2          | 2          | 0          |
| Staining intensity#       | 0    | 0    | 0    | 0    | 0    |         | 2          | 0          | 2          | 2          | 2          | 0          |
| <b>Thymus CD4:</b>        |      |      |      |      |      |         |            |            |            |            |            |            |
| Expression*               | 3    | 3    | 2    | 3    | 2    |         | 3          | 3          | 3          | 3          | 3          | 2          |
| Location^                 | 1    | 3    | 3    | 3    | 3    |         | 1          | 1          | 1          | 1          | 1          | 1          |
| <b>Spleen Foxp3:</b>      |      |      |      |      |      |         |            |            |            |            |            |            |
| Expression*               | 0    | 0    | 0    | 0    | 0    |         | 1          | 0          | 1          | 1          | 1          | 0          |
| Staining intensity#       | 0    | 0    | 0    | 0    | 0    |         | 1          | 0          | 1          | 2          | 2          | 0          |
| <b>Spleen CD4:</b>        |      |      |      |      |      |         |            |            |            |            |            |            |
| Expression*               | 2    | 2    | 1    | 1    | 1    |         | 2          | 2          | 2          | 2          | 2          | 2          |
| Staining intensity#       | 2    | 3    | 1    | 2    | 1    |         | 3          | 3          | 3          | 3          | 2          | 2          |

PE=Preeclampsia, n-PE=non-preeclamptic pregnancies; €(0=no; 1=yes with atherosclerosis 2=decidual vessel vasculopathy without atherosclerosis); \*(0=0% of cells, 1=<10%, 2=10-75%, >3=>75%); ^(1=Cortex>Medulla, 2=Medulla>Cortex, 3=Medulla=Cortex, 4=Medulla only); #(0= absent; 1=weak, 2=moderate, 3=strong). αPlacental abruption, βIUGR, γSevere maternal sequelae of pre-eclampsia, δAscending infection (Group B streptococcus), εThanatophoric dysplasia Type II, ζDied <24 hours after delivery, ηSpondylocostal dysostosis, θUrorectal septum malformation, ιMicrocephaly.

**Supplementary Table 6.** Participant Characteristics of *Nepean cohort 4*

| Characteristics      | Preeclampsia (8) | Non-Preeclampsia (36) |
|----------------------|------------------|-----------------------|
| Maternal age (yr)    | 28.3±8.0         | 31.3±4.6              |
| Gestational age (yr) | 35.5±3.4         | 38.6±1.6              |
| Birthweight (g)      | 2549±1137        | 3353.3±574            |
